# Supplementary material
Source: Springer Nature journal article supplement (https://www.springermedizin.de/resource/supplementary/12958_2008_462_MOESM3_ESM.pdf/9567952)

*elov15*

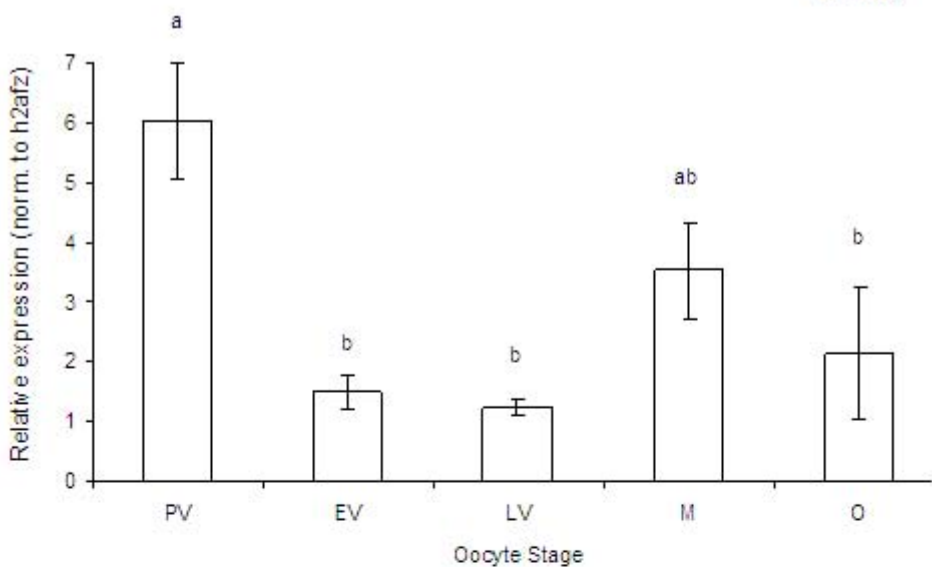

*fadsd6*

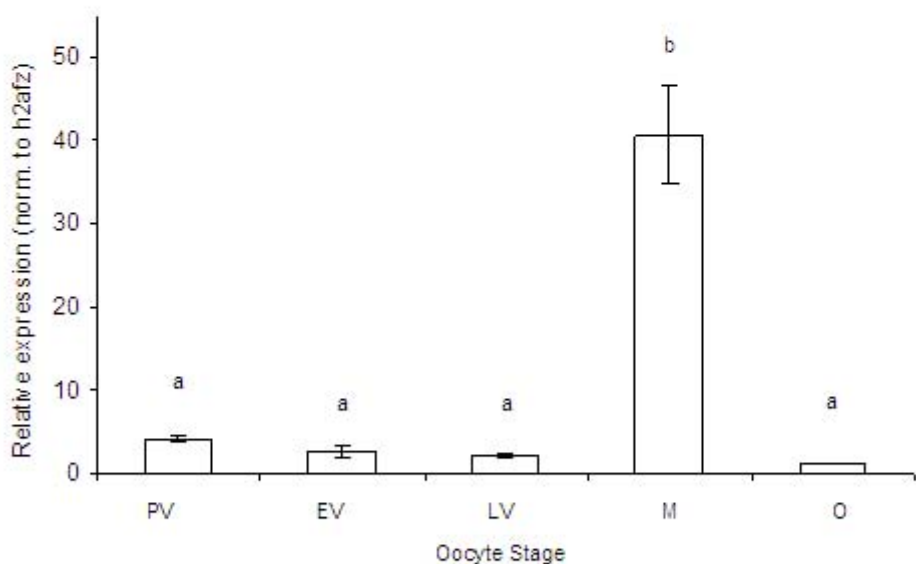

PV EV LV M O -ve

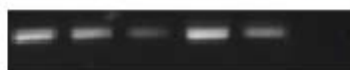

*elov15*

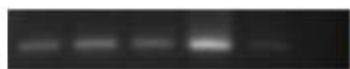

*fadsd6*

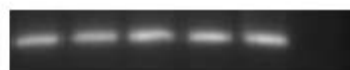

*h2afz*

Supplement: MOESM3 [file 9567952]
